# Supplementary material
Source: publisher figshare collection journal article supplement (https://acs.figshare.com/ndownloader/files/5935125)
Supplement: Supplementary file 1 [file 5935125]

# A New Complementary Catalyst and Catalytic Mechanism: Ag<sub>2</sub>MoO<sub>4</sub>/Ag/AgBr/GO Heterostructure

Yu-Yang Bai, Feng-Rui Wang, Jin-Ku Liu \*

Shanghai Key Laboratory of Multiphase Materials Chemical Engineering, School of Chemistry  
and Molecular Engineering, East China University of Science and Technology, Shanghai 200237

P.R. China

**Table S1.** The content of GO.

| Sample Number | GO content(wt %) |
|---------------|------------------|
| BG 0          | 0                |
| BG 1          | 1                |
| BG 1.5        | 1.5              |
| BG 2          | 2                |
| BG 3          | 3                |

---

\* Corresponding author; E-mail: [jkliu@ecust.edu.cn](mailto:jkliu@ecust.edu.cn)

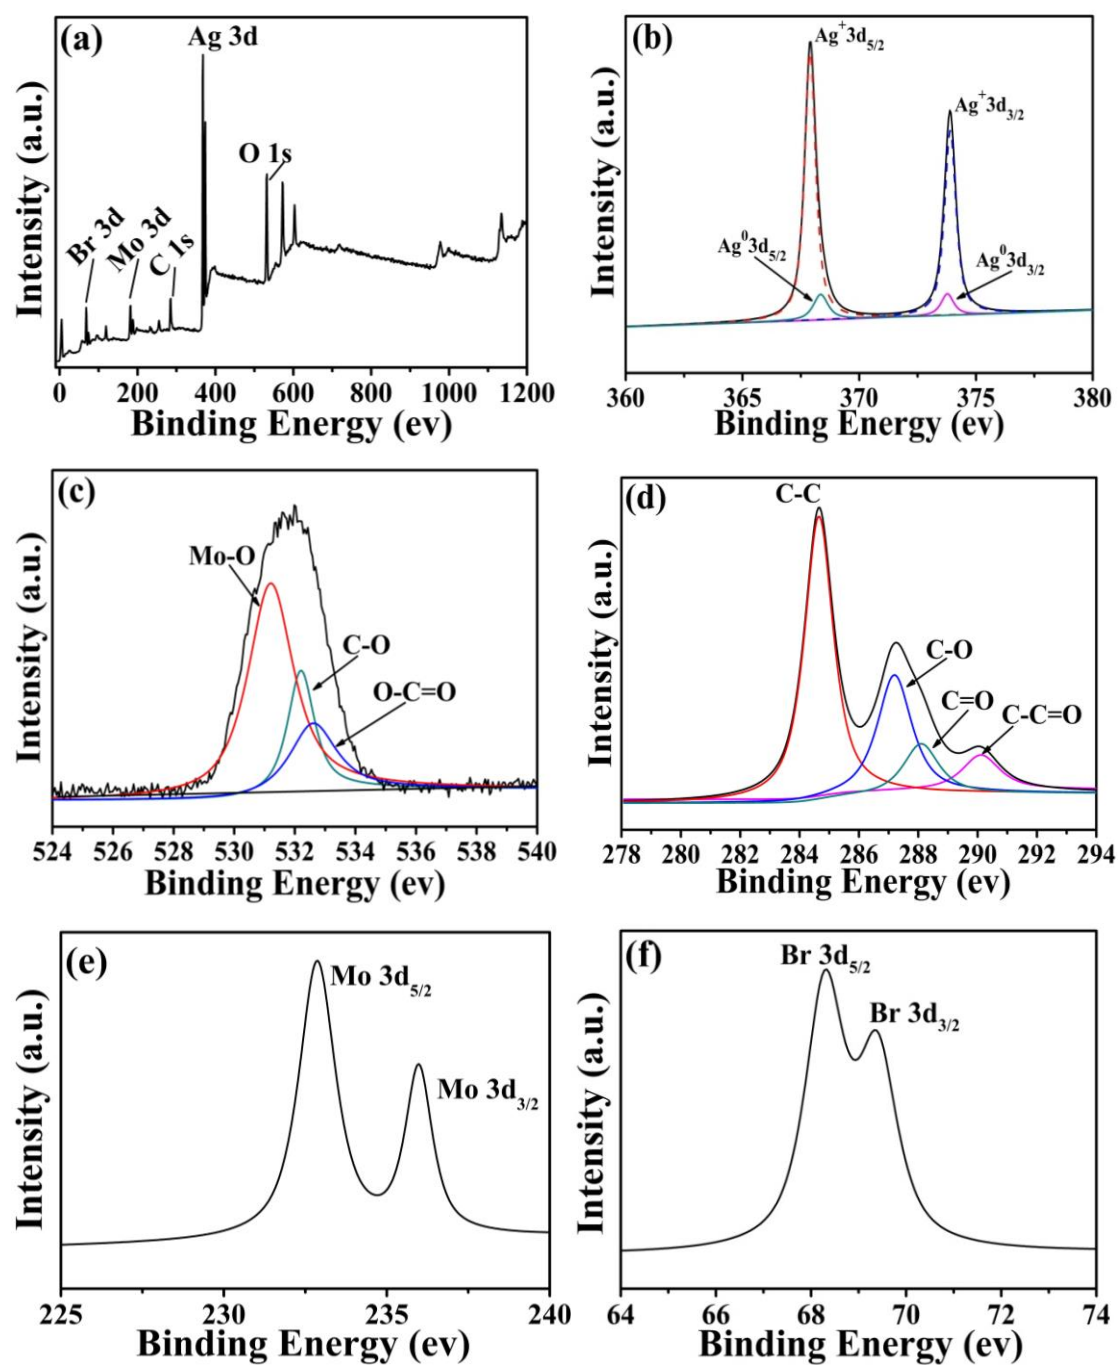

**Figure S1.** The XPS spectra of  $\text{Ag}_2\text{MoO}_4/\text{Ag}/\text{AgBr}/\text{GO}$  heterostructure (a) Survey XPS, (b) Ag  $3d_{5/2}$  and  $3d_{3/2}$ , (c) O 1s, (d) C 1s and (e) Mo 3d and (f) Br 3d

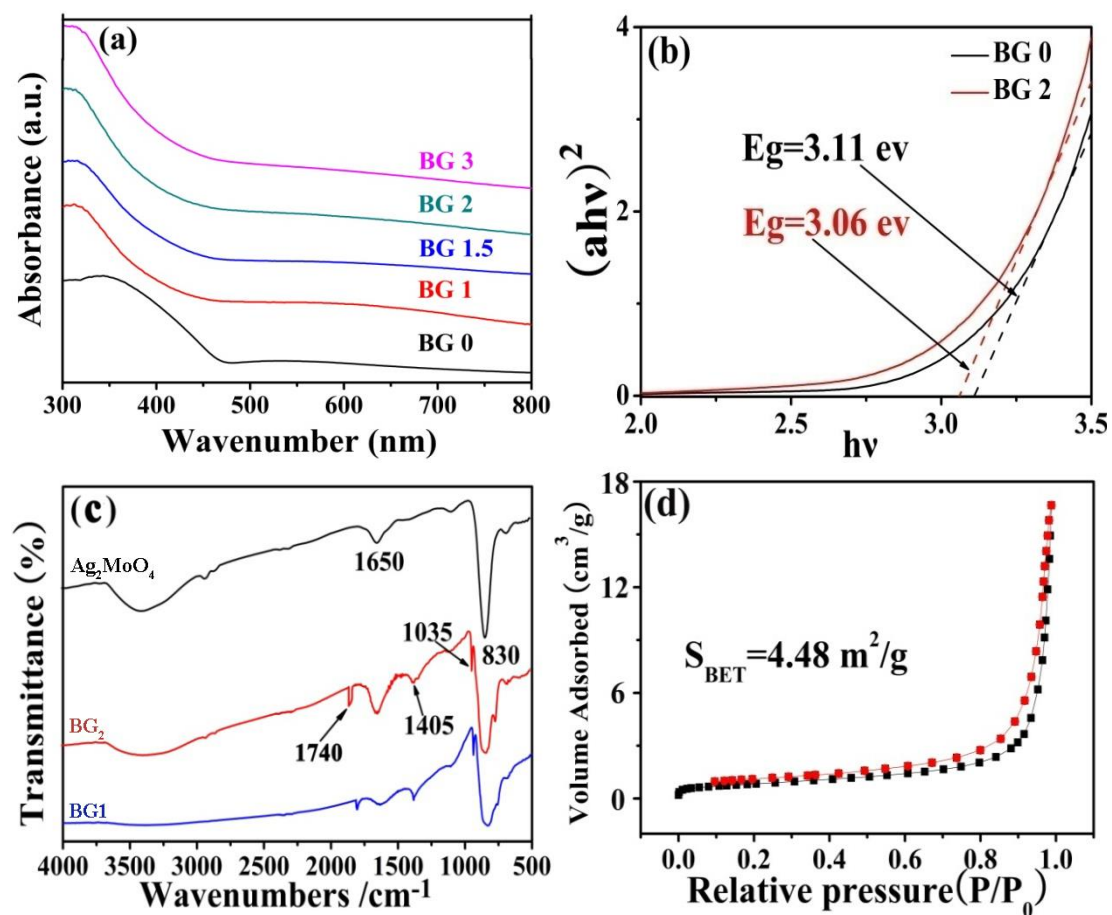

**Figure S2.** (a) UV-Vis spectrum and (b) *Kubelka-Munk* plot, (c) FT-IR spectra and (d) BET

spectrum of  $\text{Ag}_2\text{MoO}_4/\text{Ag}/\text{AgBr}/\text{GO}$  heterostructure

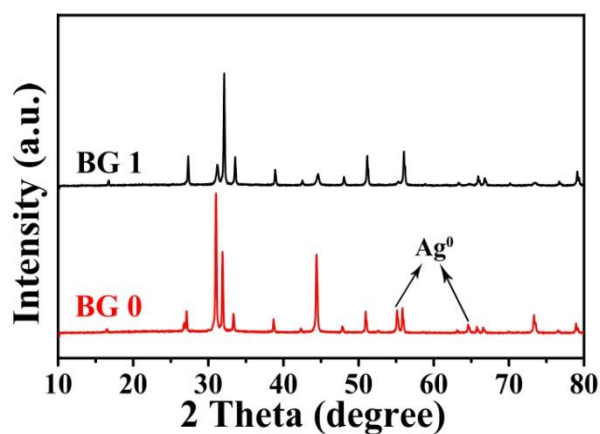

**Figure S3.** XRD spectra of BG 0 and BG 2 after recycled four times.

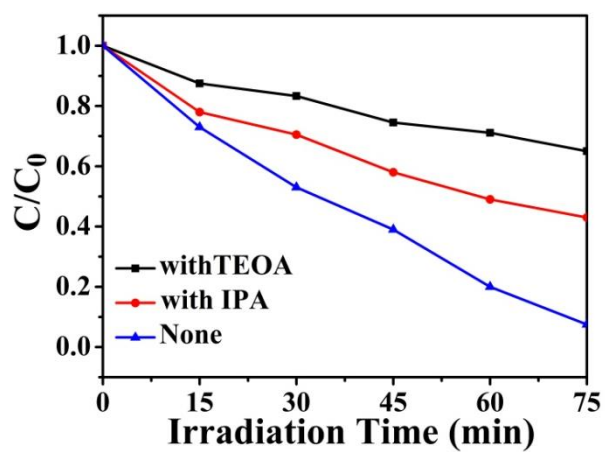

**Figure S4.** Reactive specie trapping experiments of  $\text{Ag}_2\text{MoO}_4/\text{Ag}/\text{AgBr}/\text{GO}$  heterostructure.

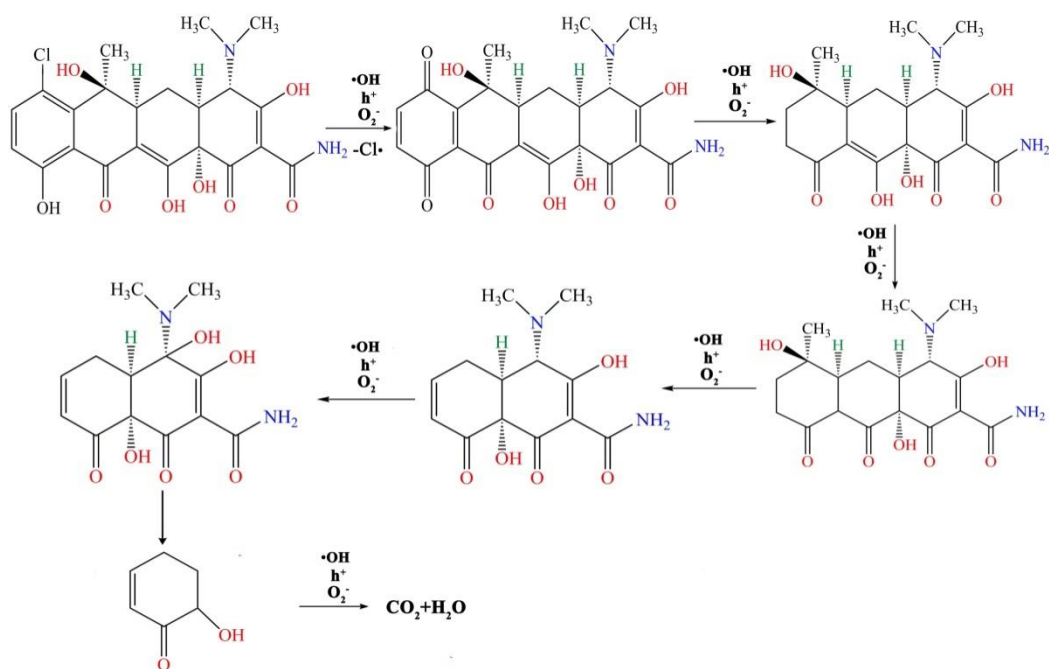

**Figure S5.** Pathway of the intermediate products for TC-HCl photodegradation.
